# Supplementary material for: A transparent, tough, highly stretchable and self-adhesive zwitterionic dual-network eutectogel for wearable flexible sensors
Source: Royal Society of Chemistry journal article supplement (doi:10.1039/d5ta00422e), 2025-01-01
Supplement: d5ta00422e1.pdf [file d5ta00422e1.pdf]

## Electronic supplementary information

### A Transparent, Tough, Highly Stretchable and Self-Adhesive

### Zwitterionic Dual-Network Eutectogel for Wearable Flexible Sensors

Zhuangzhuang Ma<sup>a</sup>, Jiale Zhang<sup>a</sup>, Zelin Ma<sup>b</sup>, Minghao Lou<sup>a</sup>, Peijin Zou<sup>a</sup>, Hongqiang

Wang<sup>b\*</sup>, Lichao Jia<sup>a\*</sup>

*a Key Laboratory of Applied Surface and Colloid Chemistry, National Ministry of Education, Shaanxi Key Laboratory for Advanced Energy Devices, Shaanxi Engineering Lab for Advanced Energy Technology, School of Materials Science and Engineering, Shaanxi Normal University, 620 West Chang'an Street, Xi'an, Shaanxi 710119, China*

*b State Key Laboratory of Solidification Processing, Center for Nano Energy Materials, School of Materials Science and Engineering, Northwestern Polytechnical University and Shaanxi Joint Laboratory of Graphene, Xi'an, 710072, P. R. China*

\* Corresponding author

*E-mail: [hongqiang.wang@nwpu.edu.cn](mailto:hongqiang.wang@nwpu.edu.cn); [lichaojia@snnu.edu.cn](mailto:lichaojia@snnu.edu.cn)*

### ***Synthesis of pAA eutectogels***

Different mass fractions (30 wt%, 40 wt%, 50 wt%, and 60 wt%) of AA monomer were added to 2.56 mL [ChCl][EG] with 0.0087 g MBAA and 0.0875 g I2959 and stirred to form a homogeneous solution. Subsequently, the above solutions were transferred into a custom-made glass mold and placed under 365 nm UV light (365 nm, 40 W) for 30 min, resulting in pAA eutectogels with different AA contents, which were named AA<sub>3</sub>, AA<sub>4</sub>, AA<sub>5</sub> and AA<sub>6</sub>, respectively.

### ***Synthesis of p(AA-co-HEMAA) eutectogels***

Different mass ratios (10:0, 8:2, 6:4, 4:6, 2:8, and 0:10 for AA:HEMAA, respectively) of AA monomer and HEMA monomer were added to 2.56 mL [ChCl][EG] with 0.0087 g MBAA and 0.0875 g I2959, respectively, and stirred to make a homogeneous solution. Subsequently, it was transferred into a customized glass mold and placed under 365 nm UV light (365 nm, 40 W) for 30 min, resulting in p(AA-co-HEMAA) eutectogels with different AA to HEMA mass ratios, which were designated as AA, A<sub>8</sub>H<sub>2</sub>, A<sub>6</sub>H<sub>4</sub>, A<sub>4</sub>H<sub>6</sub>, A<sub>2</sub>H<sub>8</sub>, and HEMA, respectively.

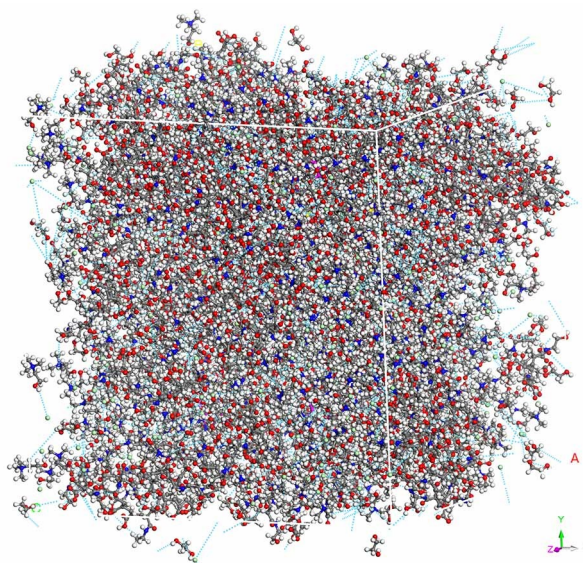

Fig. S1. Molecular dynamics calculations of AHD eutectogel. (DMAPS:AA-HEMAA:DES = 1:480:280, 3 DMAPS molecules; 1440 AA-HEMAA; 840 DES molecules)

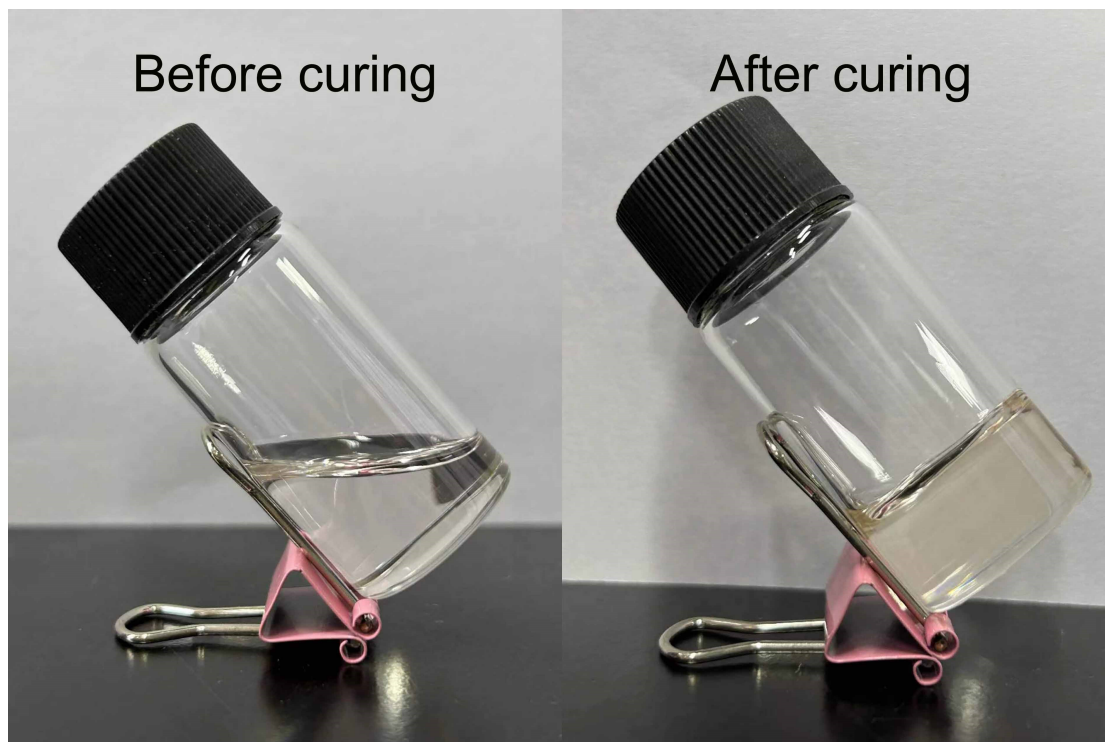

Fig. S2. Macroscopic picture of AHD eutectogel prepared.

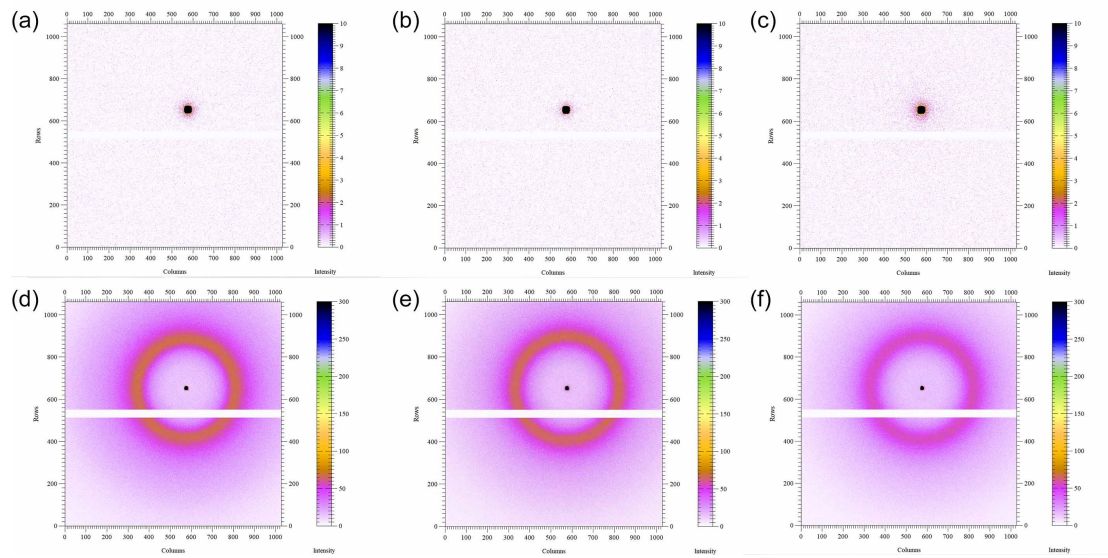

Fig. S3. (a-c) 2D SAXS and (d-f) 2D WAXS patterns of AA eutectogel, AH eutectogel and AHD eutectogel.

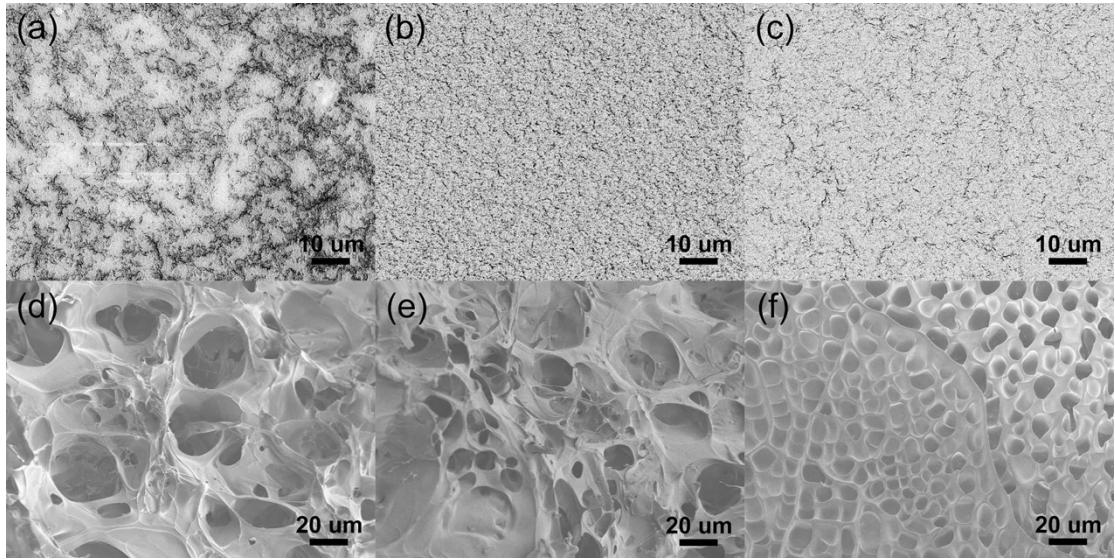

Fig. S4. SEM images of (a) AA eutectogel, (b) AH eutectogel and (c) AHD eutectogel. Post-freeze-drying SEM images: (d) AA eutectogel, (e) AH eutectogel and (f) AHD eutectogel.

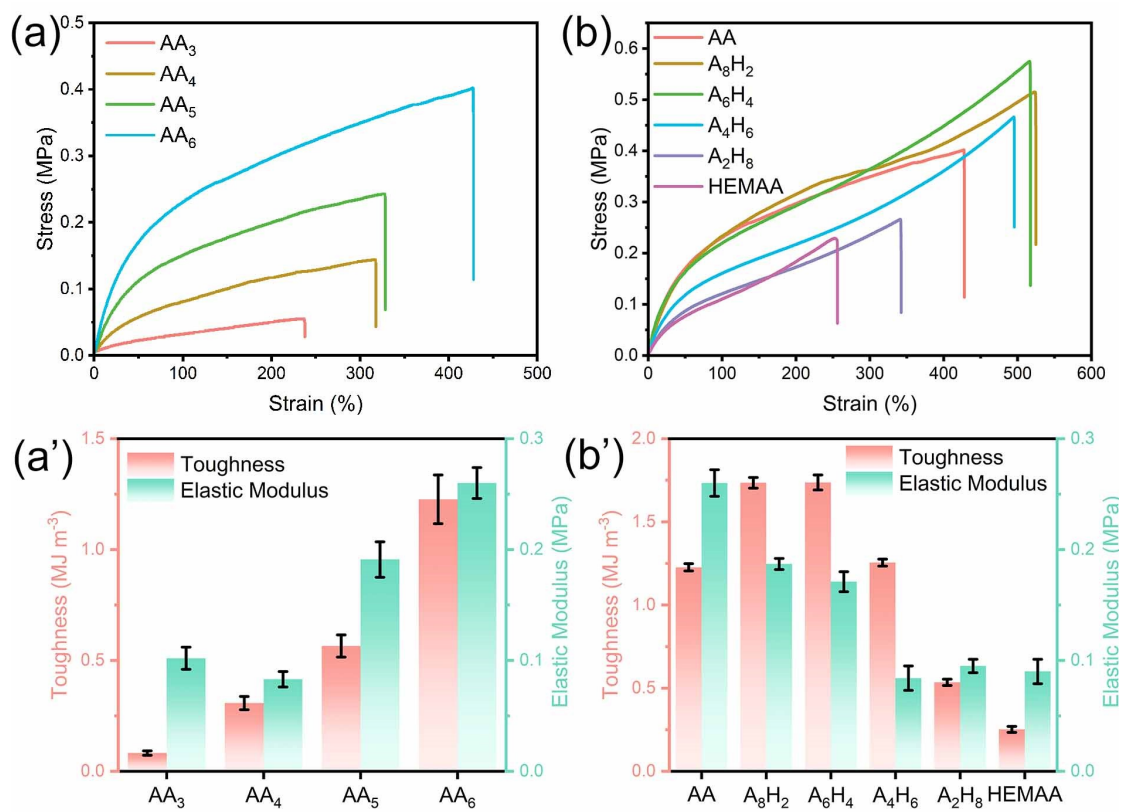

Fig. S5. Stress-strain curves and toughness-elastic modulus statistics for (a, a') AA eutectogels, (b, b') AH eutectogels.

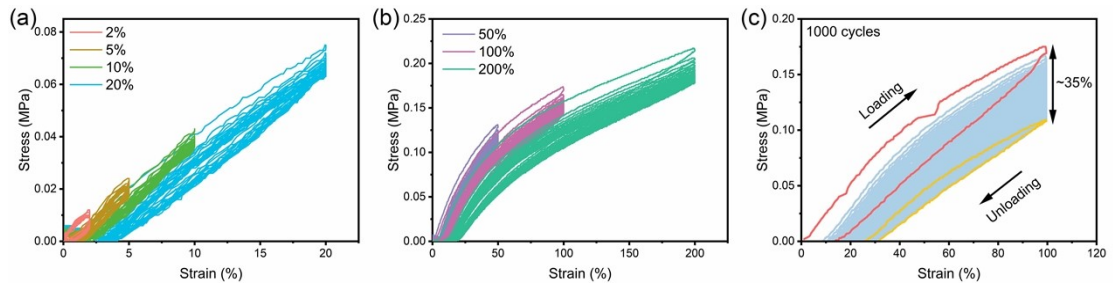

Fig. S6. (a, b) The continuous loading-unloading cyclic tests at fixed strains (2%-200%, 20 cycles per strain) of  $A_6H_4D_5$  eutectogel. (c) The rapid continuous loading-unloading cyclic tests at 100% strain with 1000 cycles per strain for the  $A_6H_4D_5$  eutectogel (tensile speed:  $500 \text{ mm min}^{-1}$ ).



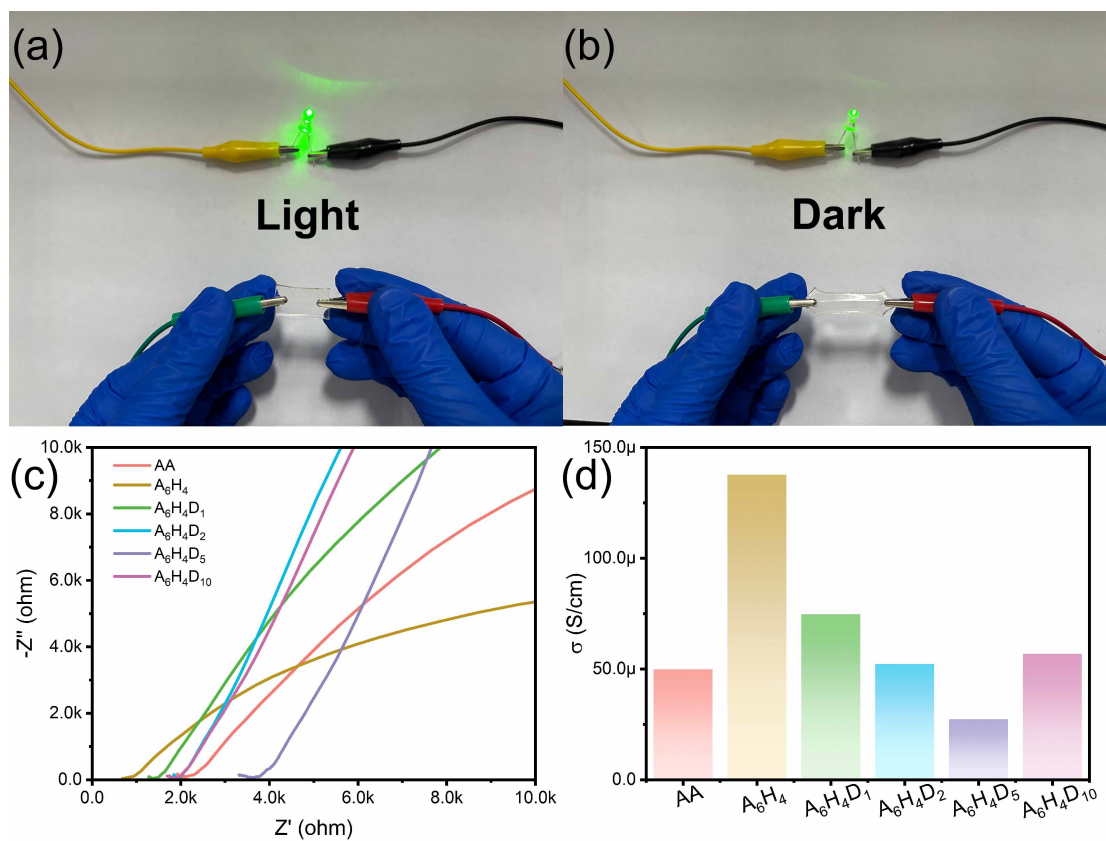

Fig. S7. LED brightness of  $A_6H_4D_5$  eutectogel in (a) initial and (b) stretched states. AA eutectogel, AH eutectogel, and AHD eutectogel with different pDMAPS contents are shown in (c) EIS curves and (d) statistical plots of ionic conductivity.

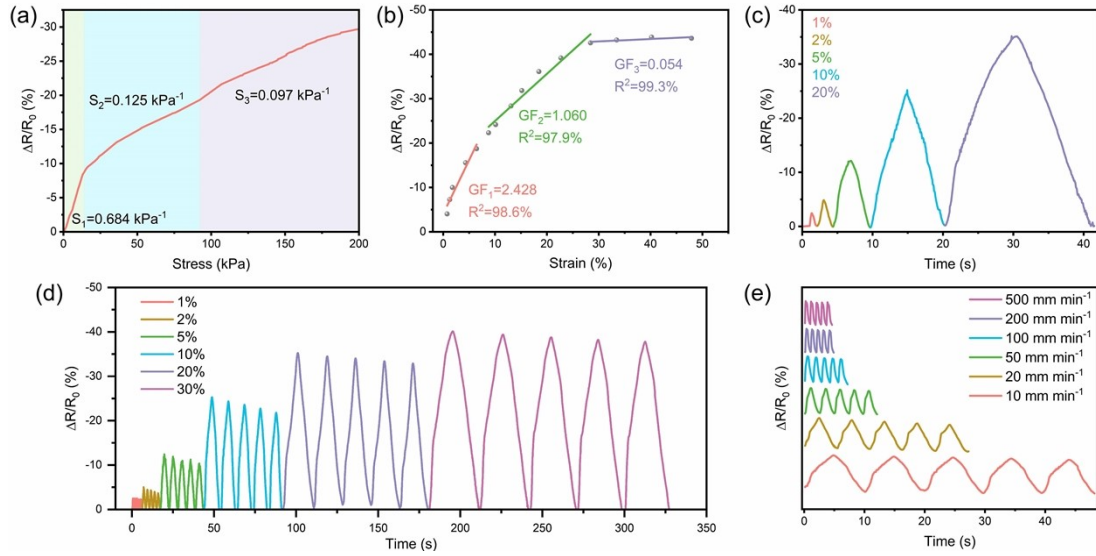

Fig. S8. (a) The pressure sensitivity of  $A_6H_4D_5$  eutectogel-based sensors under various pressures.

(b) The gauge factor of  $A_6H_4D_5$  eutectogel-based sensors at different compressive strains. (c)

Relative resistance changes of  $A_6H_4D_5$  eutectogel-based sensors during continuous loading-

unloading at different compressive strains (1%-20%). (d) Relative resistance changes of  $A_6H_4D_5$

eutectogel-based sensor during continuous loading-unloading at a fixed compressive strain. (e)

Relative resistance changes of  $A_6H_4D_5$  eutectogel-based sensor when subjected to 5 cycles of 10%

compressive strain at different tensile rates.

Table S1. Comparison of various properties between AHD eutectogel and previously reported eutectogels.

| Material                             | Transmittance (%) | Stress (MPa) | Strain (%) | Toughness (MJ m <sup>-3</sup> ) | Elastic modulus (MPa) | Adhesion strength (kPa, of glass) | Reference |
|--------------------------------------|-------------------|--------------|------------|---------------------------------|-----------------------|-----------------------------------|-----------|
| PAA/MEA/CQS                          | 92                | 0.10         | 1780       | N/A                             | N/A                   | ~75                               | 1         |
| SL-Fe <sup>3+</sup> -DES             | 93.5              | 0.21         | 700        | N/A                             | N/A                   | N/A                               | 2         |
| Zn-PAM-H <sub>2</sub> O              | N/A               | 0.49         | 1347       | N/A                             | N/A                   | N/A                               | 3         |
| poly(NAGA/ChCl/Gly/H <sub>2</sub> O) | N/A               | <0.6         | 310        | N/A                             | N/A                   | N/A                               | 4         |
| PHEAA/gelatin/MXene                  | N/A               | 0.5          | 940        | 1.39                            | 0.03035               | 36.27                             | 5         |
| PVDF-HFP/DES                         | N/A               | ~0.6         | ~300       | N/A                             | N/A                   | N/A                               | 6         |
| pDMAPS/p(AA-co-HEMAA)                | 89                | 0.569        | 637        | 2.529                           | 0.204                 | 76.9                              | This work |

## Reference

1. Y. Wu, L. Yang, J. Wang, S. Li, X. Zhang, D. Chen, Y. Ma and W. Yang, *ACS Appl. Mater. Interfaces*, 2023, **15**, 36759-36770.
2. Y. Feng, J. Yu, D. Sun, C. Dang, W. Ren, C. Shao and R. Sun, *Nano Energy*, 2022, **98**, 107284.
3. Y. Wu, Y. Deng, K. Zhang, J. Qiu, J. Wu and L. Yan, *ACS Appl. Energy Mater.*, 2022, **5**, 3013-3021.
4. Y. Liu, X. Zhang, B. Li, H. Chen, H. Li, J. Chen and H. Dong, *Chem. Eng. J.*, 2023, **461**, 141965.
5. B. Guo, M. Yao, S. Chen, Q. Yu, L. Liang, C. Yu, M. Liu, H. Hao, H. Zhang, F. Yao and J. Li, *Adv. Funct. Mater.*, 2024, **34**, 2315656.
6. Z. Li, S. Zhang, Z. Jiang, D. Cai, C. Gu and J. Tu, *Materials Chemistry and Physics*, 2021, **267**, 124701.
